# Supplementary material
Source: HighWire-hosted journal article supplement (https://jnm.snmjournals.org/highwire/filestream/95565/field_highwire_adjunct_files/0/231654_Supplemental_Data.pdf)
Supplement: 231654_Supplemental_Data.pdf [file 231654_Supplemental_Data.pdf]

**Supplemental Table 1:** Comparison of  $^{18}\text{F}$ -DCFPyL PET/CT findings to conventional imaging

| Number of scans (%)                  | CT      | MR      | $^{99\text{m}}\text{Tc}$ MDP Bone Scan | $^{18}\text{F}$ -NaF PET/CT | $^{18}\text{F}$ -Fluciclovine PET/CT |
|--------------------------------------|---------|---------|----------------------------------------|-----------------------------|--------------------------------------|
| Congruent                            | 7 (33)  | 13 (65) | 16 (67)                                | 10 (71)                     | 8 (44)                               |
| Non-Congruent                        | 14 (67) | 7 (35)  | 8 (33)                                 | 4 (29)                      | 10 (56)                              |
| Positive $^{18}\text{F}$ -DCFPyL PET | 12      | 5       | 6                                      | 2                           | 5                                    |
| Negative $^{18}\text{F}$ -DCFPyL PET | 1       |         | 1                                      | 1                           | 1                                    |
| Different findings                   | 1       | 2       | 1                                      | 1                           | 4                                    |

**Supplemental Table 2:** Impact of  $^{18}\text{F}$ -DCFPyL PET/CT on Patient Management

| Number of patients<br>(% total patients) | Positive $^{18}\text{F}$ -DCFPyL PET |               |                      |                                                  | Negative $^{18}\text{F}$ -<br>DCFPyL PET |
|------------------------------------------|--------------------------------------|---------------|----------------------|--------------------------------------------------|------------------------------------------|
|                                          | Total                                | Prostatectomy | Radiation<br>therapy | Negative<br>conventional<br>imaging <sup>†</sup> | Total                                    |
| Radiation with or<br>without ADT         | 20 (28)                              | 15 (21)       | 5 (7)                | 6 (8)                                            | 3 <sup>‡</sup> (4)                       |
| ADT                                      | 23 (32)                              | 12 (17)       | 11 (15)              | 11 (15)                                          | 3 (4)                                    |
| Surveillance                             | 5 (7)                                | 3 (4)         | 2 (3)                | 3 (4)                                            | 5 (7)                                    |
| Other                                    | 13* (18)                             | 5 (7)         | 8 (11)               | 6 (8)                                            |                                          |

\*Six patients with no documented follow up management plan yet. Three patients started ADT before the scan and continued afterwards. Three patients need additional work-up. One patient had  $^{18}\text{F}$ -DCFPyL PET as a requirement to participate in a clinical trial.

<sup>†</sup>Eight patients had not had any documented conventional imaging.

<sup>‡</sup>Two patients with negative  $^{18}\text{F}$ -DCFPyL PET scans received radiation therapy to prostate bed and pelvic lymph nodes. One patient who had negative  $^{18}\text{F}$ -DCFPyL PET but prostate bed uptake on  $^{18}\text{F}$ -Fluciclovine PET received radiation therapy.
